# Supplementary material for: A method for assessing robustness of the results of a star-shaped network meta-analysis under the unidentifiable consistency assumption
Source: PubMed Central journal article supplement (PMC8171049; doi:10.1186/s12874-021-01290-1), 2021-06-01
Supplement: 12874_2021_1290_MOESM2_ESM.pdf [file 12874_2021_1290_MOESM2_ESM.pdf]

**Table S1. Results of checking the inconsistency reported in the original analyses for smoking cessation data. Adapted from Lu and Ades, 2006 [11], and Dias et al., 2010 [16].**

| Comparisons                                              | Effect size estimate (sd) |                |               | P- value [16] |
|----------------------------------------------------------|---------------------------|----------------|---------------|---------------|
|                                                          | MTC [11]                  | Direct [16]    | Indirect [16] |               |
| NI versus SH                                             | 0.449 (0.441)             | 0.342 (0.55)   | 0.706 (0.635) | 0.65          |
| NI versus IC                                             | 0.860 (0.248)             | 0.845 (0.254)  | 0.673 (0.679) | 0.79          |
| NI versus GC                                             | 1.088 (0.516)             | 1.360 (0.829)  | 1.108 (0.539) | 0.81          |
| SH versus IC                                             | 0.258 (0.519)             | -0.052 (0.702) | 0.519 (0.503) | 0.49          |
| SH versus GC                                             | 0.636 (0.546)             | 0.676 (0.698)  | 0.511 (0.684) | 0.85          |
| IC versus GC                                             | 0.226 (0.545)             | -0.085(0.479)  | 1.708 (0.893) | 0.07          |
| Variance of inconsistency factor ( $\sigma_{\omega}^2$ ) | 0.61                      |                |               |               |
| Variance of heterogeneity ( $\tau^2$ )                   | 0.78                      |                |               |               |
| $P(\sigma_{\omega}^2 > \tau^2)$                          | 0.226                     |                |               |               |

NI, no intervention; SH, self-help; IC, individual counseling; GC, group counseling; P- value, Bayesian p-value measuring agreement between direct and indirect estimates for each split node; MTC, mixed treatment comparison;

**Table S2. Simulated datasets**

| Standard error | Study | Comparison | $I^2$       |             |             |
|----------------|-------|------------|-------------|-------------|-------------|
|                |       |            | 0%          | 40%         | 70%         |
|                |       |            | Effect size | Effect size | Effect size |
| 1              | 1     | A vs B     | 0.5         | -1          | -1.7        |
|                | 2     | A vs B     | 0.5         | -0.5        | -1          |
|                | 3     | A vs B     | 0.5         | 0.5         | 0.5         |
|                | 4     | A vs B     | 0.5         | 1.5         | 2           |
|                | 5     | A vs B     | 0.5         | 2           | 2.7         |
|                | 6     | A vs C     | 1           | -0.5        | -1.2        |
|                | 7     | A vs C     | 1           | 0           | -0.5        |
|                | 8     | A vs C     | 1           | 1           | 1           |
|                | 9     | A vs C     | 1           | 2           | 2.5         |
|                | 10    | A vs C     | 1           | 2.5         | 3.2         |
| 2              | 1     | A vs B     | 0.5         | -2.5        | -4          |
|                | 2     | A vs B     | 0.5         | -1.5        | -2          |
|                | 3     | A vs B     | 0.5         | 0.5         | 0.5         |
|                | 4     | A vs B     | 0.5         | 2.5         | 3           |
|                | 5     | A vs B     | 0.5         | 3.5         | 5           |
|                | 6     | A vs C     | 1           | -2          | -3.5        |
|                | 7     | A vs C     | 1           | -1          | -1.5        |
|                | 8     | A vs C     | 1           | 1           | 1           |
|                | 9     | A vs C     | 1           | 3           | 3.5         |
|                | 10    | A vs C     | 1           | 4           | 5.5         |
| $2\sqrt{2}$    | 1     | A vs B     | 0.5         | -4          | -5.5        |
|                | 2     | A vs B     | 0.5         | -2          | -3.5        |
|                | 3     | A vs B     | 0.5         | 0.5         | 0.5         |
|                | 4     | A vs B     | 0.5         | 3           | 4.5         |
|                | 5     | A vs B     | 0.5         | 5           | 6.5         |
|                | 6     | A vs C     | 1           | -3.5        | -5          |
|                | 7     | A vs C     | 1           | -1.5        | -3          |
|                | 8     | A vs C     | 1           | 1           | 1           |
|                | 9     | A vs C     | 1           | 3.5         | 5           |
|                | 10    | A vs C     | 1           | 5.5         | 7           |

**Table S3. Results of a network meta-analysis using the complete network and derived star-shaped network for the smoking cessation data**

|               | Parameter | Complete network   |         | Star-shaped network |         |
|---------------|-----------|--------------------|---------|---------------------|---------|
|               |           | Estimate (95% CrI) | P(best) | Estimate (95% CrI)  | P(best) |
| Treatment     |           |                    |         |                     |         |
| A: NI         | -         |                    | 0.00    |                     | 0.00    |
| B: SH         | $d_{AB}$  | 0.43 (-0.38, 1.25) | 0.04    | 0.33 (-0.73, 1.39)  | 0.02    |
| C: IC         | $d_{AC}$  | 0.73 (0.26, 1.20)  | 0.10    | 0.72 (0.19, 1.25)   | 0.04    |
| D: GC         | $d_{AD}$  | 1.38 (0.25, 2.50)  | 0.86    | 3.52 (0.12, 6.93)   | 0.94    |
| Heterogeneity |           |                    |         |                     |         |
|               | $\tau$    | 0.78               |         | 0.85                |         |

CrI, credible interval; NI, no intervention; SH, self-help; IC, individual counseling; GC, group counseling.
